# Supplementary material
Source: PubMed Central journal article supplement (PMC2799790)
Supplement: 0912257106_0912257106SI.pdf [file 0912257106_0912257106SI.pdf]

# Supporting Information

Samaco et al. 10.1073/pnas.0912257106

## SI Materials and Methods

**Human Spinal Fluid Collection.** The protocol and consent form were approved by the Institutional Review Boards of Baylor College of Medicine, University of Alabama–Birmingham, and the Children’s Hospital of Eastern Ontario. Spinal fluid was collected from 64 girls with clinically defined RTT with pathogenic *MECP2* mutations using the consensus criteria (1). Spinal taps were performed using standard sterile technique under mild sedation (0.05 mg/kg midazolam). A 5-cc quantity of spinal fluid was collected into five predefined, prelabeled tubes provided by the examining laboratory at Baylor University Institute for Metabolic Studies, Dallas, TX, where the analysis for amine metabolites was performed using established HPLC techniques (2). A natural logarithm transformation was applied to the values of 5-HIAA and HVA to acquire a more normally distributed distribution for parametric statistical analysis. A general linear modeling technique was used to perform ANCOVA, comparing metabolite levels in groups (e.g., control vs. study, p.Arg168X vs. p.Arg133Cys) while controlling for age. Control data were restricted to the same age (2.5–28 years) as individuals with RTT.

**HPLC Analysis of Biogenic Amine Levels.** Monoamines in mouse brain tissue were measured after isocratic HPLC separation by electrochemical detection. Briefly, samples were homogenized (1:9 wt/vol) in ice-cold 0.4 M perchloric acid containing 1 mmol/L sodium bisulfite. Samples were centrifuged at 10,000 g for 10 min and 10  $\mu$ l of the clear supernatant injected onto a SphereClone 3 $\mu$  ODS C18 reversed phase column (100  $\times$  4.6 mm, Phenomenex). The mobile phase consisted of 0.05M KH<sub>2</sub>PO<sub>4</sub> containing 1 mM sodium octyl sulfate, 50  $\mu$ M EDTA, and 9% methanol. The pH was adjusted to 3.0 using concentrated phosphoric acid. The flow rate was 1 ml/min and temperature was maintained at 35 °C. Analytes were detected and quantified using an ESA Coularray 8 electrode electrochemical detector (ESA). At least four animals per genotype were used. *Mecp2*<sup>null/y</sup> animals and their respective wild-type littermates were 6–8 weeks of age, and aminergic-CKO animals and their respective littermates were at least 20 weeks of age.

**Nonradioactive in Situ Hybridization.** Probes were PCR amplified from wild-type mouse brain cDNA using the following primers, followed by digoxigenin labeling: *Th* (5'-GATTGCAGAGATGCTTCC-3' and 5'-CCTGTGGGTGGTACCCTATG-3'); *Tph2* (5'-GTATTGAGAATGTGGTGCAGGA-3' and 5'-CACTCAGTCTACATCCATCCCA-3'). ISH was performed on brain tissue obtained from *Mecp2*<sup>null/y</sup> animals and their respective wild-type littermates at 6–8 weeks of age.

**ChIP-PCR and ChIP-qPCR.** ChIP using three *Mecp2*<sup>null/y</sup> and three wild-type littermate brains was performed as previously described (3). DNA was PCR amplified using the following primers: *Th* (5'-GAAAGGTCCCCTCTCTGGTC-3' and 5'-TTGAAGACACAGCCTGCAAC-3', 60 °C anneal, 32 cycles, 347 bp product); *Tph2* (5'-CAAGCTTTCCTGTGGCTTTC-3' and 5'-AACCATGGTGTTCATGT-3', 60 °C anneal, 32 cycles, 267 bp product). ChIP-qPCR was performed as previously described (3). The ddCT method was used to calculate the fold enrichment of chromatin fragments immunoprecipitated with anti-Mecp2 antibody (Millipore) compared with a control antibody (normal rabbit IgG, Millipore), relative to input samples. Statistical significance was determined using a paired *t* test.

**Immunofluorescence.** Coronal floating sections (50  $\mu$ m) obtained from the brain of an adult ( $\approx$ 16- to 20-week old) mouse were processed and imaged as previously described (4). Primary antibodies used were anti-Mecp2 (1:100, Millipore) and anti-TH (1:1000, Sigma) for TH-CKO animals or anti- $\beta$ gal (1:500, Abcam) for PET1-CKO animals that harbored an additional *ROSA*<sup>R26R</sup> allele (5). Secondary antibodies used were goat anti-rabbit conjugated to Alexa 488 (Mecp2), and goat anti-mouse conjugated to Cy3 (TH) or chicken anti- $\beta$ gal (Abcam).

**Behavioral Analysis.** TH-Cre animals were maintained on a pure FVB/N background. PET1-Cre animals were maintained on a pure C57BL/6 background. Mice were maintained on a 12 h light:12 h dark cycle with standard mouse chow and water ad libitum. All research and animal care procedures were approved by the Baylor College of Medicine Institutional Animal Care and Use Committee. Cre animals were bred to *Mecp2*<sup>Flox/+</sup> females on a pure 129S6/SvEv background. At least 15 animals per genotype were used for behavioral testing, except where indicated. All four subsequent male F1 progeny (wild-type, Cre, *Mecp2*<sup>Flox/y</sup> and Cre; *Mecp2*<sup>Flox/y</sup>) were tested for motor function (dowel walking test at 16 weeks of age, and open-field arena at 15 weeks of age), motor learning (accelerating rotating rod at 13 weeks of age), anxiety-like behavior (light-dark box exploration task at 12–14 weeks of age), social behavior (partition test for social interest at 20 weeks of age), and learning and memory (fear conditioning at 21 weeks of age), as previously described (4, 6). For PET1-CKO animals, an additional cohort of at least 19 animals per group were generated for grooming, repetitive behavior, and breathing tests (see below). Marble burying was performed as previously described at 8 weeks of age (7). A resident intruder test was performed at 20 weeks of age on six to 10 animals per genotype as previously described (6). After whole-body plethysmography, a splash test for grooming was performed as previously described at  $\approx$ 28 weeks of age (8).

**Breathing Measurements.** For TH-CKO animals, whole-body plethysmographic measurements of the frequency and depth of breathing were made from unrestrained male mice (16 weeks of age, 4 per genotype) as previously described (4). For PET1-CKO animals ( $\approx$ 27 weeks of age, 7–10 per genotype), mice were placed within unrestrained whole-body plethysmography chambers (Buxco),  $\approx$ 500 ml in volume with a continuous flow rate of 1 L/min flushing the chambers with fresh air. Mice were allowed to acclimate for 20 min, and breathing was then recorded for 30 min. Breath waveforms and the instantaneous breathing rate were identified and calculated with Biosystem XA software (Buxco). Breathing rate distributions were constructed by determining the percentage of total accepted breaths spent at a particular breath rate with bins of 25 breaths/min.

**Statistical Analysis.** All data were analyzed using a commercially available statistical software package (SPSS, version 17.0). Analysis of HPLC, qPCR, ISH, and Western data were performed using a one-way ANOVA. The majority of behavior data were analyzed using two-way ANOVA (*Mecp2*-Flox allele and Cre allele), and one-way ANOVA followed by LSD post hoc comparisons ( $P \leq 0.05$ ). Data related to accelerating rotating rod and partition test for social interest were analyzed using a three-way ANOVA with repeated measures (*Mecp2*-Flox allele, Cre allele, and day (for rotating rod) or encounter type (for social interest)). Data related to dowel walking, resident intruder,

and splash test were analyzed using Kruskal–Wallis with Mann–Whitney  $U$  post hoc comparisons made for significant differences ( $P \leq 0.05$ ).

1. Hagberg B, Hanefeld F, Percy A, Skjeldal O (2002) An update on clinically applicable diagnostic criteria in Rett syndrome. Comments to Rett Syndrome Clinical Criteria Consensus Panel Satellite to European Paediatric Neurology Society Meeting, Baden Baden, Germany, 11 September 2001. *Eur J Paediatr Neurol* 6:293–297.
2. Hyland K (2008) Clinical utility of monoamine neurotransmitter metabolite analysis in cerebrospinal fluid. *Clin Chem* 54:633–641.
3. Chahrouh M, et al. (2008) MeCP2, a key contributor to neurological disease, activates and represses transcription. *Science* 320:1224–1229.
4. Samaco RC, et al. (2008) A partial loss of function allele of methyl-CpG-binding protein 2 predicts a human neurodevelopmental syndrome. *Hum Mol Genet* 17:1718–1727.
5. Soriano P (1999) Generalized lacZ expression with the ROSA26 Cre reporter strain. *Nat Genet* 21:70–71.
6. Fyffe SL, et al. (2008) Deletion of MeCP2 in Sim1-expressing neurons reveals a critical role for MeCP2 in feeding behavior, aggression, and the response to stress. *Neuron* 59:947–958.
7. Thomas A, et al. (2009) Marble burying reflects a repetitive and perseverative behavior more than novelty-induced anxiety. *Psychopharmacology (Berl)* 204:361–373.
8. Ducotet C, Belzung C (2004) Behaviour in the elevated plus-maze predicts coping after subchronic mild stress in mice. *Physiol Behav* 81:417–426.





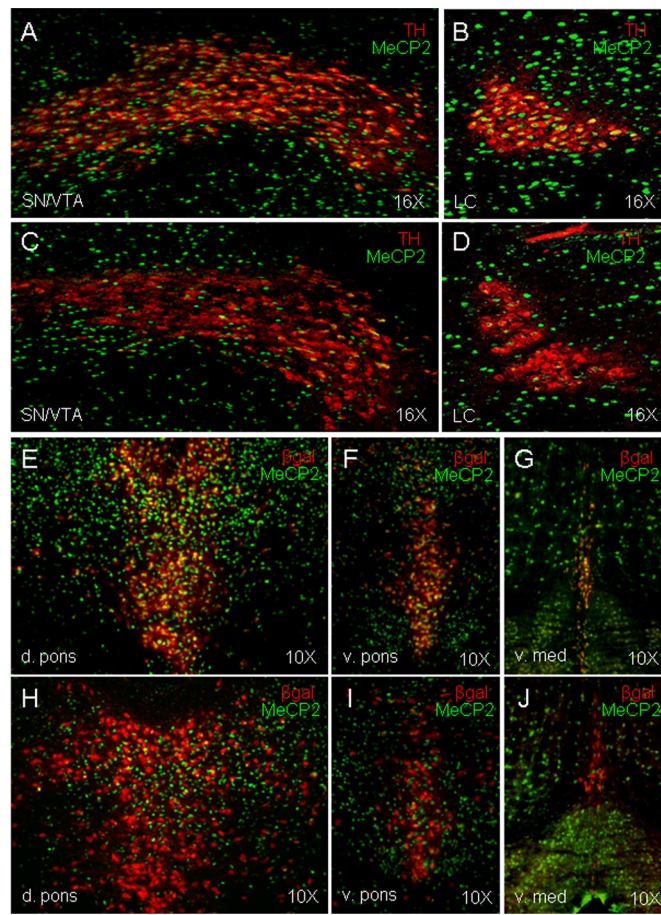

**Fig. S3.** Efficient recombination within Cre expression domains for both TH CKO and Pet1 CKO lines. Immunofluorescence analysis of coronal sections through various brain regions was performed to demonstrate the efficiency of recombination at the *Mecp2* locus when the conditional allele was exposed to either TH-Cre (C and D) or Pet1-Cre (H–J). All sections were stained with anti-Mecp2 and labeled with a green fluorophore. To identify the TH-expressing neurons, sections in panels A–D were colabeled with an anti-TH antibody (red) and anti-Mecp2 antibody (green). To identify the Pet1 expression lineage, sections in panels E–J also contained a transgenic reporter that expresses the lacZ gene product  $\beta$ -galactosidase ( $\beta$ gal) in a Cre-dependent fashion. These sections were colabeled with an antibody that recognizes  $\beta$ gal (red) and anti-Mecp2 antibody (green). MeCP2 is lost in the majority of substantia nigra/ventral tegmental area (SN/VTA) cells and locus ceruleus (LC) in TH CKO animals (C and D) compared with Flox alone animals (A and B). Likewise, Pet1-CKO animals (H–J) showed a significant reduction compared with wild-type animals (E–G) in cells that express MeCP2 in the major serotonin producing neurons of the dorsal pons (E and H), ventral pons (F and I), and ventral medulla (G and J). Magnification is indicated for each image in the lower right-hand corner.









| Behavioral paradigm                    | Measurement                   | Statistical test                         | Comparison                | Statistics                        | Degrees of freedom                  | $\rho$     | Fig.   |        |      |    |
|----------------------------------------|-------------------------------|------------------------------------------|---------------------------|-----------------------------------|-------------------------------------|------------|--------|--------|------|----|
| TH-CKO: Rotating rod (cont'd)          | Latency to fall (sec)         | Fisher's LSD: Day 2                      | TH-CKO vs. Cre            |                                   |                                     | 0.50       | 4E     |        |      |    |
|                                        |                               |                                          | TH-CKO vs. Flox           |                                   |                                     | 0.35       |        |        |      |    |
|                                        |                               |                                          | Flox vs. WT               |                                   |                                     | 0.08       |        |        |      |    |
|                                        |                               |                                          | Flox vs. Cre              |                                   |                                     | 0.11       |        |        |      |    |
|                                        |                               |                                          | WT vs. Cre                |                                   |                                     | 0.87       |        |        |      |    |
|                                        |                               | One-way ANOVA: Day 3                     | Genotype                  | F = 1.08                          | 3, 59                               | 0.18       |        |        |      |    |
|                                        |                               | Fisher's LSD: Day 3                      | TH-CKO vs. WT             |                                   |                                     | 0.23       |        |        |      |    |
|                                        |                               |                                          | TH-CKO vs. Cre            |                                   |                                     | 0.75       |        |        |      |    |
|                                        |                               |                                          | TH-CKO vs. Flox           |                                   |                                     | 0.33       |        |        |      |    |
|                                        |                               |                                          | Flox vs. WT               |                                   |                                     | 0.03       |        |        |      |    |
|                                        |                               | One-way ANOVA: Day 4                     | Genotype                  | F = 2.62                          | 3, 59                               | 0.06       |        |        |      |    |
|                                        |                               |                                          | Fisher's LSD: Day 4       | TH-CKO vs. WT                     |                                     |            |        | 0.07   |      |    |
|                                        |                               | TH-CKO: Light-dark exploration           | Time in lit side (% time) | Two-way ANOVA                     | Factor 1: <i>Mecp2</i> -Flox allele | F = 0.58   |        | 1, 58  | 0.45 | 4F |
|                                        |                               |                                          |                           |                                   | Factor 2: TH-Cre allele             | F = 0.15   |        | 1, 58  | 0.70 |    |
|                                        |                               |                                          |                           |                                   | Interaction (F1 $\times$ F2)        | F = 1.02   |        | 1, 58  | 0.32 |    |
| One-way ANOVA                          | Genotype                      |                                          |                           |                                   | F = 0.58                            | 3, 58      | 0.63   |        |      |    |
| Fisher's LSD                           | TH-CKO vs. WT                 |                                          |                           |                                   |                                     |            | 0.79   |        |      |    |
| One-way ANOVA                          | TH-CKO vs. Cre                |                                          |                           |                                   |                                     | 0.86       |        |        |      |    |
|                                        | TH-CKO vs. Flox               |                                          |                           |                                   |                                     | 0.34       |        |        |      |    |
|                                        | Flox vs. WT                   |                                          |                           |                                   |                                     | 0.25       |        |        |      |    |
|                                        | Flox vs. Cre                  |                                          |                           |                                   |                                     | 0.42       |        |        |      |    |
| TH-CKO: Partition                      | Time social interest (% time) |                                          |                           | Three-way repeated measures ANOVA | Factor 1: <i>Mecp2</i> -Flox allele | F = 6.05   | 1, 57  | 0.02   | 4G   |    |
|                                        |                               |                                          |                           |                                   | Factor 2: TH-Cre allele             | F = 1.49   | 1, 57  | 0.23   |      |    |
|                                        |                               |                                          |                           |                                   | Factor 3: Encounter                 | F = 121.58 | 2, 114 | <0.001 |      |    |
|                                        |                               |                                          |                           |                                   | Interaction (F1 $\times$ F3)        | F = 2.62   | 2, 114 | 0.08   |      |    |
|                                        |                               |                                          |                           |                                   | Interaction (F2 $\times$ F3)        | F = 0.06   | 2, 114 | 0.94   |      |    |
|                                        |                               |                                          |                           |                                   | Interaction (F1 $\times$ F2)        | F = 3.78   | 1, 57  | 0.06   |      |    |
|                                        |                               | Interaction (F1 $\times$ F2 $\times$ F3) | F = 1.04                  |                                   | 2, 114                              | 0.36       |        |        |      |    |
|                                        |                               | One-way ANOVA: Familiar                  | Genotype                  | F = 1.31                          | 3, 57                               | 0.28       |        |        |      |    |
|                                        |                               | Fisher's LSD: Familiar                   | TH-CKO vs. WT             |                                   |                                     | 0.96       |        |        |      |    |
|                                        |                               |                                          | TH-CKO vs. Cre            |                                   |                                     | 0.93       |        |        |      |    |
| TH-CKO vs. Flox                        |                               |                                          |                           | 0.11                              |                                     |            |        |        |      |    |
| One-way ANOVA: Novel                   | Flox vs. WT                   |                                          |                           | 0.11                              |                                     |            |        |        |      |    |
|                                        | Flox vs. Cre                  |                                          |                           | 0.13                              |                                     |            |        |        |      |    |
|                                        | WT vs. Cre                    |                                          |                           | 0.89                              |                                     |            |        |        |      |    |
|                                        | Genotype                      | F = 3.44                                 |                           | 0.02                              |                                     |            |        |        |      |    |
| Fisher's LSD: Novel                    | TH-CKO vs. WT                 |                                          |                           | 0.18                              |                                     |            |        |        |      |    |
|                                        | TH-CKO vs. Cre                |                                          |                           | 0.25                              |                                     |            |        |        |      |    |
|                                        | TH-CKO vs. Flox               |                                          |                           | 0.15                              |                                     |            |        |        |      |    |
|                                        | Flox vs. WT                   |                                          |                           | 0.01                              |                                     |            |        |        |      |    |
|                                        | Flox vs. Cre                  |                                          |                           | 0.01                              |                                     |            |        |        |      |    |
| One-way ANOVA: Familiar, 2nd encounter | Genotype                      | F = 3.26                                 |                           | 0.03                              |                                     |            |        |        |      |    |
|                                        | WT vs. Cre                    |                                          |                           | 0.82                              |                                     |            |        |        |      |    |
|                                        | TH-CKO vs. WT                 |                                          |                           | 0.64                              |                                     |            |        |        |      |    |

| Behavioral paradigm                       | Measurement         | Statistical test                    | Comparison                            | Statistics                          | Degrees of freedom | $p$      | Fig.   |       |      |
|-------------------------------------------|---------------------|-------------------------------------|---------------------------------------|-------------------------------------|--------------------|----------|--------|-------|------|
| TH-CKO: Fear conditioning                 | Cue (% freezing)    | Two-way ANOVA                       | TH-CKO vs. Cre                        |                                     |                    | 0.73     | 4H     |       |      |
|                                           |                     |                                     | TH-CKO vs. Flox                       |                                     |                    | 0.02     |        |       |      |
|                                           |                     |                                     | Flox vs. WT                           |                                     |                    | 0.01     |        |       |      |
|                                           |                     |                                     | Flox vs. Cre                          |                                     |                    | 0.04     |        |       |      |
|                                           |                     |                                     | WT vs. Cre                            |                                     |                    | 0.41     |        |       |      |
|                                           |                     |                                     | Factor 1: <i>Mecp2</i> -Flox allele   | F = 2.05                            | 1, 59              | 0.16     |        |       |      |
|                                           |                     |                                     | Factor 2: TH-Cre allele               | F = 0.57                            | 1, 59              | 0.45     |        |       |      |
|                                           |                     |                                     | Interaction (F1 × F2)                 | F = 0.11                            | 1, 59              | 0.74     |        |       |      |
|                                           |                     |                                     | Context (% freezing)                  | One-way ANOVA<br>Fisher's LSD       | Genotype           | F = 0.92 |        | 3, 59 | 0.44 |
|                                           | TH-CKO vs. WT       |                                     |                                       |                                     |                    | 0.64     |        |       |      |
|                                           | TH-CKO vs. Cre      |                                     |                                       |                                     |                    | 0.22     |        |       |      |
|                                           | TH-CKO vs. Flox     |                                     |                                       |                                     |                    | 0.77     |        |       |      |
|                                           | Flox vs. WT         |                                     |                                       |                                     |                    | 0.44     |        |       |      |
|                                           | Flox vs. Cre        |                                     |                                       |                                     |                    | 0.12     |        |       |      |
|                                           | WT vs. Cre          |                                     |                                       |                                     |                    | 0.44     |        |       |      |
|                                           | Two-way ANOVA       | Factor 1: <i>Mecp2</i> -Flox allele |                                       |                                     | F = 18.39          | 1, 59    | <0.001 |       |      |
|                                           |                     | Factor 2: TH-Cre allele             |                                       |                                     | F = 2.04           | 1, 59    | 0.16   |       |      |
|                                           |                     | Interaction (F1 × F2)               | F = 0.05                              | 1, 59                               | 0.82               |          |        |       |      |
| One-way ANOVA<br>Fisher's LSD             |                     | Genotype                            | F = 6.90                              | 3, 59                               | <0.001             |          |        |       |      |
|                                           |                     | TH-CKO vs. WT                       |                                       |                                     | 0.05               |          |        |       |      |
|                                           |                     | TH-CKO vs. Cre                      |                                       |                                     | 0.01               |          |        |       |      |
|                                           |                     | TH-CKO vs. Flox                     |                                       |                                     | 0.25               |          |        |       |      |
|                                           |                     | Flox vs. WT                         |                                       |                                     | 0.00               |          |        |       |      |
|                                           |                     | Flox vs. Cre                        |                                       |                                     | 0.00               |          |        |       |      |
|                                           | WT vs. Cre          |                                     |                                       | 0.40                                |                    |          |        |       |      |
|                                           | PET1-CKO: Partition | Time social interest (% time)       | Three-way repeated measures ANOVA     | Factor 1: <i>Mecp2</i> -Flox allele | F = 24.47          | 1, 60    | <0.001 | 5A    |      |
|                                           |                     |                                     |                                       | Factor 2: PET1-Cre allele           | F = 0.43           | 1, 60    | 0.52   |       |      |
| Factor 3: Encounter                       |                     |                                     |                                       | F = 124.27                          | 2, 120             | <0.001   |        |       |      |
| Interaction (F1 × F3)                     |                     |                                     |                                       | F = 2.40                            | 2, 120             | 0.09     |        |       |      |
| Interaction (F2 × F3)                     |                     |                                     |                                       | F = 0.36                            | 2, 120             | 0.70     |        |       |      |
| Interaction (F1 × F2)                     |                     |                                     |                                       | F = 0.14                            | 1, 60              | 0.71     |        |       |      |
| Interaction (F1 × F2 × F3)                |                     |                                     |                                       | F = 0.24                            | 2, 120             | 0.79     |        |       |      |
| One-way ANOVA:<br>Familiar                |                     |                                     |                                       | Genotype                            | F = 3.36           | 3, 60    | 0.02   |       |      |
|                                           |                     |                                     |                                       | Fisher's LSD: Familiar              | PET1-CKO vs. WT    |          |        |       | 0.04 |
|                                           |                     |                                     |                                       |                                     | PET1-CKO vs. Cre   |          |        |       | 0.13 |
|                                           |                     |                                     |                                       |                                     | PET1-CKO vs. Flox  |          |        |       | 0.51 |
|                                           |                     |                                     |                                       |                                     | Flox vs. WT        |          |        |       | 0.01 |
|                                           |                     |                                     | Flox vs. Cre                          |                                     |                    |          | 0.03   |       |      |
| One-way ANOVA:<br>Novel                   |                     |                                     | Genotype                              | F = 4.43                            | 3, 60              | 0.01     |        |       |      |
|                                           |                     |                                     | Fisher's LSD: Novel                   | PET1-CKO vs. WT                     |                    |          | <0.001 |       |      |
|                                           |                     |                                     |                                       | PET1-CKO vs. Cre                    |                    |          | 0.02   |       |      |
|                                           |                     |                                     |                                       | PET1-CKO vs. Flox                   |                    |          | 0.66   |       |      |
|                                           |                     |                                     |                                       | Flox vs. WT                         |                    |          | 0.01   |       |      |
|                                           |                     |                                     |                                       | Flox vs. Cre                        |                    |          | 0.05   |       |      |
| One-way ANOVA:<br>Familiar, 2nd encounter |                     |                                     | Genotype                              | F = 7.92                            | 3, 60              | 0.01     |        |       |      |
|                                           |                     |                                     | Fisher's LSD: Familiar, 2nd encounter | PET1-CKO vs. WT                     |                    |          | <0.001 |       |      |
|                                           | PET1-CKO vs. Cre    |                                     |                                       |                                     | <0.001             |          |        |       |      |
|                                           | PET1-CKO vs. Flox   |                                     |                                       |                                     | 0.66               |          |        |       |      |
|                                           | Flox vs. WT         |                                     |                                       |                                     | <0.001             |          |        |       |      |
|                                           | Flox vs. Cre        |                                     |                                       |                                     | <0.001             |          |        |       |      |
|                                           | WT vs. Cre          |                                     |                                       |                                     | 0.54               |          |        |       |      |
|                                           | Genotype            | F = 7.92                            |                                       | 3, 60                               | 0.01               |          |        |       |      |
|                                           | PET1-CKO vs. WT     |                                     |                                       |                                     | <0.001             |          |        |       |      |
| PET1-CKO vs. Flox                         |                     |                                     | 0.66                                  |                                     |                    |          |        |       |      |
| Flox vs. WT                               |                     |                                     | <0.001                                |                                     |                    |          |        |       |      |
| Flox vs. Cre                              |                     |                                     | <0.001                                |                                     |                    |          |        |       |      |
| WT vs. Cre                                |                     |                                     | 0.64                                  |                                     |                    |          |        |       |      |

| Behavioral paradigm              | Measurement                  | Statistical test                   | Comparison                                                   | Statistics  | Degrees of freedom | $p$    | Fig. |
|----------------------------------|------------------------------|------------------------------------|--------------------------------------------------------------|-------------|--------------------|--------|------|
| PET1-CKO: Resident intruder      | Time aggressive (% time)     | Kruskal–Wallis<br>Mann–Whitney $U$ | PET1-CKO vs. WT                                              | $H = 16.75$ | 3                  | 0.00   | 5B   |
|                                  |                              |                                    | PET1-CKO vs. Cre                                             |             |                    | <0.001 |      |
|                                  |                              |                                    | PET1-CKO vs. Flox                                            |             |                    | <0.001 |      |
|                                  |                              |                                    | Flox vs. WT                                                  |             |                    | <0.001 |      |
|                                  |                              |                                    | Flox vs. Cre                                                 |             |                    | <0.001 |      |
| PET1-CKO: Light–dark exploration | Time in lit side (% time)    | Two-way ANOVA                      | Factor 1: <i>Mecp2</i> -Flox allele                          | $F = 0.11$  | 1, 60              | 0.75   | 5C   |
|                                  |                              |                                    | Factor 2: PET1-Cre allele                                    | $F = 0.39$  | 1, 60              | 0.53   |      |
|                                  |                              |                                    | Interaction ( $F1 \times F2$ )                               | $F = 0.002$ | 1, 60              | 0.97   |      |
|                                  |                              |                                    | Genotype                                                     | $F = 0.17$  | 3, 60              | 0.92   |      |
|                                  |                              | One-way ANOVA<br>Fisher's LSD      | PET1-CKO vs. WT                                              |             |                    | 0.83   |      |
|                                  |                              |                                    | PET1-CKO vs. Cre                                             |             |                    | 0.84   |      |
|                                  |                              |                                    | PET1-CKO vs. Flox                                            |             |                    | 0.64   |      |
|                                  |                              |                                    | Flox vs. WT                                                  |             |                    | 0.80   |      |
|                                  |                              |                                    | Flox vs. Cre                                                 |             |                    | 0.50   |      |
|                                  |                              |                                    | WT vs. Cre                                                   |             |                    | 0.68   |      |
| PET1-CKO: Splash test            | Grooming (% time)            | Kruskal–Wallis<br>Mann–Whitney $U$ | PET1-CKO vs. WT                                              | $H = 6.83$  | 3                  | 0.08   | 5D   |
|                                  |                              |                                    | PET1-CKO vs. Cre                                             |             |                    | 0.96   |      |
|                                  |                              |                                    | PET1-CKO vs. Flox                                            |             |                    | 0.33   |      |
|                                  |                              |                                    | Flox vs. WT                                                  |             |                    | 0.13   |      |
|                                  |                              |                                    | Flox vs. Cre                                                 |             |                    | 0.11   |      |
| PET-CKO: Marble burying          | Marbles buried (total #)     | Two-way ANOVA                      | Factor 1: <i>Mecp2</i> -Flox allele                          | $F = 29.34$ | 1, 76              | <0.001 | 5E   |
|                                  |                              |                                    | Factor 2: PET1-Cre allele                                    | $F = 0.07$  | 1, 76              | 0.79   |      |
|                                  |                              |                                    | Interaction ( $F1 \times F2$ )                               | $F = 1.05$  | 1, 76              | 0.31   |      |
|                                  |                              |                                    | Genotype                                                     | $F = 10.13$ | 3, 76              | <0.001 |      |
|                                  |                              | One-way ANOVA<br>Fisher's LSD      | PET1-CKO vs. WT                                              |             |                    | <0.001 |      |
|                                  |                              |                                    | PET1-CKO vs. Cre                                             |             |                    | <0.001 |      |
|                                  |                              |                                    | PET1-CKO vs. Flox                                            |             |                    | 0.60   |      |
|                                  |                              |                                    | Flox vs. WT                                                  |             |                    | <0.001 |      |
|                                  |                              |                                    | Flox vs. Cre                                                 |             |                    | <0.001 |      |
|                                  |                              |                                    | WT vs. Cre                                                   |             |                    | 0.36   |      |
| PET1-CKO: Open field             | Total distance traveled (cm) | Two-way ANOVA                      | Factor 1: <i>Mecp2</i> -Flox allele                          | $F = 4.70$  | 1, 60              | 0.03   | 5F   |
|                                  |                              |                                    | Factor 2: PET1-Cre allele                                    | $F = 5.19$  | 1, 60              | 0.03   |      |
|                                  |                              |                                    | Interaction ( $F1 \times F2$ )                               | $F = 0.30$  | 1, 60              | 0.59   |      |
|                                  |                              |                                    | Genotype                                                     | $F = 3.40$  | 3, 60              | 0.02   |      |
|                                  |                              | One-way ANOVA<br>Fisher's LSD      | PET1-CKO vs. WT                                              |             |                    | <0.001 |      |
|                                  |                              |                                    | PET1-CKO vs. Cre                                             |             |                    | 0.06   |      |
|                                  |                              |                                    | PET1-CKO vs. Flox                                            |             |                    | 0.05   |      |
|                                  |                              |                                    | Flox vs. WT                                                  |             |                    | 0.26   |      |
|                                  |                              |                                    | Flox vs. Cre                                                 |             |                    | 0.94   |      |
|                                  |                              |                                    | WT vs. Cre                                                   |             |                    | 0.22   |      |
| PET1-CKO: Dowl walking           | Side touches (total #)       | Kruskal–Wallis<br>Mann–Whitney $U$ | PET1-CKO vs. WT                                              | $H = 1.41$  | 3                  | 0.07   | 5G   |
|                                  |                              |                                    | PET1-CKO vs. Cre                                             |             |                    | 0.48   |      |
|                                  |                              |                                    | PET1-CKO vs. Flox                                            |             |                    | 0.85   |      |
|                                  |                              |                                    | Flox vs. WT                                                  |             |                    | 0.71   |      |
|                                  |                              |                                    | Flox vs. Cre                                                 |             |                    | 0.22   |      |
| PET1-CKO: Rotating rod           | Latency to fall (sec)        | Three-way repeated measures ANOVA  | Factor 1: <i>Mecp2</i> -Flox allele                          | $F = 8.97$  | 1, 76              | <0.001 | 5H   |
|                                  |                              |                                    | Factor 2: PET1-Cre allele                                    | $F = 10.32$ | 1, 76              | <0.001 |      |
|                                  |                              |                                    | Factor 3: <i>Mecp2</i> -Flox allele $\times$ PET1-Cre allele |             |                    |        |      |
|                                  |                              |                                    | Factor 1 $\times$ Factor 2                                   |             |                    |        |      |
|                                  |                              |                                    | Factor 1 $\times$ Factor 3                                   |             |                    |        |      |

| Behavioral paradigm             | Measurement           | Statistical test             | Comparison                               | Statistics        | Degrees of freedom | $p$    | Fig. |
|---------------------------------|-----------------------|------------------------------|------------------------------------------|-------------------|--------------------|--------|------|
| PET1-CKO: Rotating rod (cont'd) | Latency to fall (sec) | One-way ANOVA: Day 1         | Factor 3: Day                            | $F = 127.02$      | 3, 228             | <0.001 | 5H   |
|                                 |                       |                              | Interaction (F1 $\times$ F3)             | $F = 2.67$        | 3, 228             | 0.05   |      |
|                                 |                       |                              | Interaction (F2 $\times$ F3)             | $F = 6.46$        | 3, 228             | <0.001 |      |
|                                 |                       |                              | Interaction (F1 $\times$ F2)             | $F = 1.01$        | 1, 76              | 0.32   |      |
|                                 |                       |                              | Interaction (F1 $\times$ F2 $\times$ F3) | $F = 0.35$        | 3, 228             | 0.79   |      |
|                                 |                       |                              | Genotype                                 | $F = 3.65$        | 3, 76              | 0.02   |      |
|                                 |                       | Fisher's LSD: Day 1          | PET1-CKO vs. WT                          | 0.66              |                    |        |      |
|                                 |                       |                              | PET1-CKO vs. Cre                         | 0.01              |                    |        |      |
|                                 |                       |                              | PET1-CKO vs. Flox                        | 0.76              |                    |        |      |
|                                 |                       |                              | Flox vs. WT                              | 0.46              |                    |        |      |
|                                 |                       |                              | Flox vs. Cre                             | <0.001            |                    |        |      |
|                                 |                       |                              | WT vs. Cre                               | 0.03              |                    |        |      |
|                                 |                       | One-way ANOVA: Day 2         | Genotype                                 | $F = 4.91$        | 3, 76              | <0.001 |      |
|                                 |                       |                              | Fisher's LSD: Day 2                      | PET1-CKO vs. WT   | 0.74               |        |      |
|                                 |                       |                              |                                          | PET1-CKO vs. Cre  | <0.001             |        |      |
|                                 |                       |                              |                                          | PET1-CKO vs. Flox | 0.56               |        |      |
|                                 |                       |                              |                                          | Flox vs. WT       | 0.36               |        |      |
|                                 |                       |                              |                                          | Flox vs. Cre      | <0.001             |        |      |
|                                 |                       | WT vs. Cre                   |                                          | 0.01              |                    |        |      |
|                                 |                       | One-way ANOVA: Day 3         | Genotype                                 | $F = 6.39$        | 3, 76              | <0.001 |      |
|                                 |                       |                              | Fisher's LSD: Day 3                      | PET1-CKO vs. WT   | 0.96               |        |      |
|                                 |                       |                              |                                          | PET1-CKO vs. Cre  | <0.001             |        |      |
|                                 |                       |                              |                                          | PET1-CKO vs. Flox | 0.20               |        |      |
|                                 |                       |                              |                                          | Flox vs. WT       | 0.21               |        |      |
| Flox vs. Cre                    | <0.001                |                              |                                          |                   |                    |        |      |
| WT vs. Cre                      | <0.001                |                              |                                          |                   |                    |        |      |
| One-way ANOVA: Day 4            | Genotype              | $F = 5.30$                   | 3, 76                                    | <0.001            |                    |        |      |
|                                 | Fisher's LSD: Day 4   | PET1-CKO vs. WT              | 0.02                                     |                   |                    |        |      |
|                                 |                       | PET1-CKO vs. Cre             | 0.14                                     |                   |                    |        |      |
|                                 |                       | PET1-CKO vs. Flox            | 0.55                                     |                   |                    |        |      |
|                                 |                       | Flox vs. WT                  | 0.14                                     |                   |                    |        |      |
|                                 |                       | Flox vs. Cre                 | <0.001                                   |                   |                    |        |      |
| WT vs. Cre                      |                       | 0.02                         |                                          |                   |                    |        |      |
| PET1-CKO: Fear conditioning     | Cue (% freezing)      | Two-way ANOVA                | Factor 1: <i>Mecp2</i> -Flox allele      | $F = 0.58$        | 1, 60              | <0.001 | 5I   |
|                                 |                       |                              | Factor 2: PET1-Cre allele                | $F = 0.15$        | 1, 60              | 0.180  |      |
|                                 |                       |                              | Interaction (F1 $\times$ F2)             | $F = 1.02$        | 1, 60              | 0.91   |      |
|                                 |                       | One-way ANOVA                | Genotype                                 | $F = 3.53$        | 3, 60              | 0.020  |      |
|                                 |                       |                              | PET1-CKO vs. WT                          | <0.001            |                    |        |      |
|                                 |                       |                              | PET1-CKO vs. Cre                         | 0.05              |                    |        |      |
|                                 |                       | Fisher's LSD                 | PET1-CKO vs. Flox                        | 0.39              |                    |        |      |
|                                 |                       |                              | Flox vs. WT                              | 0.04              |                    |        |      |
|                                 |                       |                              | Flox vs. Cre                             | 0.26              |                    |        |      |
|                                 | WT vs. Cre            |                              | 0.29                                     |                   |                    |        |      |
|                                 | Two-way ANOVA         |                              | Factor 1: <i>Mecp2</i> -Flox allele      | $F = 32.54$       | 1, 60              | <0.001 |      |
|                                 |                       |                              | Factor 2: PET1-Cre allele                | $F = 0.26$        | 1, 60              | 0.61   |      |
|                                 |                       | Interaction (F1 $\times$ F2) | $F = 2.48$                               | 1, 60             | 0.12               |        |      |
|                                 | Context (% freezing)  | One-way ANOVA                | Genotype                                 | $F = 11.94$       | 3, 60              | <0.001 |      |
|                                 |                       |                              | PET1-CKO vs. WT                          | <0.001            |                    |        |      |
|                                 |                       |                              | PET1-CKO vs. Cre                         | <0.001            |                    |        |      |
|                                 |                       | Fisher's LSD                 | PET1-CKO vs. Flox                        | 0.15              |                    |        |      |
|                                 |                       |                              | Flox vs. WT                              | 0.01              |                    |        |      |
| Flox vs. Cre                    |                       |                              | <0.001                                   |                   |                    |        |      |
| WT vs. Cre                      |                       |                              | 0.45                                     |                   |                    |        |      |

| Behavioral paradigm                      | Measurement                                                                                 | Statistical test                 | Comparison                             | Statistics                             | Degrees of freedom | $p$   | Fig. |    |
|------------------------------------------|---------------------------------------------------------------------------------------------|----------------------------------|----------------------------------------|----------------------------------------|--------------------|-------|------|----|
| PET1-CKO:<br>Plethysmography             | Breathing distribution<br>(% time breathing $\times$<br>25 breaths per<br>minute intervals) | Two-way ANOVA: 25<br>breaths/min | Factor 1: <i>Mecp2</i> -Flox<br>allele | F = 0.20                               | 1, 32              | 0.20  | S4   |    |
|                                          |                                                                                             |                                  | Factor 2: PET1-Cre<br>allele           | F = 0.08                               | 1, 32              | 0.08  |      |    |
|                                          |                                                                                             |                                  | Interaction (F1 $\times$ F2)           | F = 0.65                               | 1, 32              | 0.65  |      |    |
|                                          |                                                                                             |                                  | Genotype                               | F = 1.73                               | 3, 32              | 0.18  |      |    |
|                                          |                                                                                             | One-way ANOVA<br>Fisher's LSD    | PET1-CKO vs. WT                        |                                        | 0.74               |       |      |    |
|                                          |                                                                                             |                                  | PET1-CKO vs. Cre                       |                                        | 0.22               |       |      |    |
|                                          |                                                                                             |                                  | PET1-CKO vs. Flox                      |                                        | 0.35               |       |      |    |
|                                          |                                                                                             |                                  | Flox vs. WT                            |                                        | 0.55               |       |      |    |
|                                          |                                                                                             |                                  | Flox vs. Cre                           |                                        | 0.03               |       |      |    |
|                                          |                                                                                             |                                  | WT vs. Cre                             |                                        | 0.12               |       |      |    |
|                                          |                                                                                             |                                  | Two-way ANOVA: 50<br>breaths/min       | Factor 1: <i>Mecp2</i> -Flox<br>allele | F = 0.50           | 1, 32 | 0.50 |    |
|                                          |                                                                                             |                                  |                                        | Factor 2: PET1-Cre<br>allele           | F = 0.09           | 1, 32 | 0.09 |    |
|                                          |                                                                                             | Interaction (F1 $\times$ F2)     |                                        | F = 0.94                               | 1, 32              | 0.94  |      |    |
|                                          |                                                                                             | Genotype                         |                                        | F = 1.15                               | 3, 32              | 0.34  |      |    |
|                                          |                                                                                             | One-way ANOVA<br>Fisher's LSD    | PET1-CKO vs. WT                        |                                        | 0.46               |       |      |    |
|                                          |                                                                                             |                                  | PET1-CKO vs. Cre                       |                                        | 0.60               |       |      |    |
|                                          |                                                                                             |                                  | PET1-CKO vs. Flox                      |                                        | 0.25               |       |      |    |
|                                          |                                                                                             |                                  | Flox vs. WT                            |                                        | 0.67               |       |      |    |
|                                          |                                                                                             |                                  | Flox vs. Cre                           |                                        | 0.10               |       |      |    |
|                                          |                                                                                             |                                  | WT vs. Cre                             |                                        | 0.21               |       |      |    |
| PET1-CKO:<br>Plethysmography<br>(cont'd) | Breathing distribution<br>(% time breathing $\times$<br>25 breaths per<br>minute intervals) |                                  | Two-way ANOVA: 75<br>breaths/min       | Factor 1: <i>Mecp2</i> -Flox<br>allele | F = 0.23           | 1, 32 | 0.23 | S4 |
|                                          |                                                                                             |                                  |                                        | Factor 2: PET1-Cre<br>allele           | F = 0.03           | 1, 32 | 0.03 |    |
|                                          |                                                                                             | Interaction (F1 $\times$ F2)     |                                        | F = 0.67                               | 1, 32              | 0.67  |      |    |
|                                          |                                                                                             | Genotype                         |                                        | F = 2.25                               | 3, 32              | 0.10  |      |    |
|                                          |                                                                                             | One-way ANOVA<br>Fisher's LSD    | PET1-CKO vs. WT                        |                                        | 0.47               |       |      |    |
|                                          |                                                                                             |                                  | PET1-CKO vs. Cre                       |                                        | 0.58               |       |      |    |
|                                          |                                                                                             |                                  | PET1-CKO vs. Flox                      |                                        | 0.07               |       |      |    |
|                                          |                                                                                             |                                  | Flox vs. WT                            |                                        | 0.25               |       |      |    |
|                                          |                                                                                             |                                  | Flox vs. Cre                           |                                        | 0.02               |       |      |    |
|                                          |                                                                                             |                                  | WT vs. Cre                             |                                        | 0.20               |       |      |    |
|                                          |                                                                                             |                                  | Two-way ANOVA: 100<br>breaths/min      | Factor 1: <i>Mecp2</i> -Flox<br>allele | F = 0.09           | 1, 32 | 0.09 |    |
|                                          |                                                                                             |                                  |                                        | Factor 2: PET1-Cre<br>allele           | F = 0.11           | 1, 32 | 0.11 |    |
|                                          |                                                                                             | Interaction (F1 $\times$ F2)     |                                        | F = 0.26                               | 1, 32              | 0.26  |      |    |
|                                          |                                                                                             | Genotype                         |                                        | F = 2.36                               | 3, 32              | 0.09  |      |    |
|                                          |                                                                                             | One-way ANOVA<br>Fisher's LSD    | PET1-CKO vs. WT                        |                                        | 0.97               |       |      |    |
|                                          |                                                                                             |                                  | PET1-CKO vs. Cre                       |                                        | 0.69               |       |      |    |
|                                          |                                                                                             |                                  | PET1-CKO vs. Flox                      |                                        | 0.06               |       |      |    |
|                                          |                                                                                             |                                  | Flox vs. WT                            |                                        | 0.05               |       |      |    |
|                                          |                                                                                             |                                  | Flox vs. Cre                           |                                        | 0.02               |       |      |    |
|                                          |                                                                                             |                                  | WT vs. Cre                             |                                        | 0.72               |       |      |    |
| Two-way ANOVA: 125<br>breaths/min        | Factor 1: <i>Mecp2</i> -Flox<br>allele                                                      |                                  | F = 0.05                               | 1, 32                                  | 0.05               |       |      |    |
|                                          | Factor 2: PET1-Cre<br>allele                                                                |                                  | F = 0.983197910566376                  | 1, 32                                  | 0.98               |       |      |    |
|                                          | Interaction (F1 $\times$ F2)                                                                | F = 0.20                         | 1, 32                                  | 0.20                                   |                    |       |      |    |
|                                          | Genotype                                                                                    | F = 1.89                         | 3, 32                                  | 0.15                                   |                    |       |      |    |
| One-way ANOVA<br>Fisher's LSD            | PET1-CKO vs. WT                                                                             |                                  | 0.17                                   |                                        |                    |       |      |    |
|                                          | PET1-CKO vs. Cre                                                                            |                                  | 0.63                                   |                                        |                    |       |      |    |
|                                          | PET1-CKO vs. Flox                                                                           |                                  | 0.35                                   |                                        |                    |       |      |    |
|                                          | Flox vs. WT                                                                                 |                                  | 0.03                                   |                                        |                    |       |      |    |
|                                          | Flox vs. Cre                                                                                |                                  | 0.16                                   |                                        |                    |       |      |    |
|                                          | WT vs. Cre                                                                                  |                                  | 0.38                                   |                                        |                    |       |      |    |

| Behavioral paradigm                      | Measurement                                                                                 | Statistical test                  | Comparison                             | Statistics | Degrees of freedom | $p$    | Fig. |
|------------------------------------------|---------------------------------------------------------------------------------------------|-----------------------------------|----------------------------------------|------------|--------------------|--------|------|
| PET1-CKO:<br>Plethysmography<br>(cont'd) | Breathing distribution<br>(% time breathing $\times$<br>25 breaths per<br>minute intervals) | Two-way ANOVA: 150<br>breaths/min | Factor 1: <i>Mecp2</i> -Flox<br>allele | F = 1.00   | 1, 32              | 1.00   |      |
|                                          |                                                                                             |                                   | Factor 2: PET1-Cre<br>allele           | F = 0.13   | 1, 32              | 0.13   |      |
|                                          |                                                                                             |                                   | Interaction (F1 $\times$ F2)           | F = 0.82   | 1, 32              | 0.82   |      |
|                                          |                                                                                             | One-way ANOVA<br>Fisher's LSD     | Genotype                               | F = 0.81   | 3, 32              | 0.50   |      |
|                                          |                                                                                             |                                   | PET1-CKO vs. WT                        |            |                    | 0.29   |      |
|                                          |                                                                                             |                                   | PET1-CKO vs. Cre                       |            |                    | 0.88   |      |
|                                          |                                                                                             |                                   | PET1-CKO vs. Flox                      |            |                    | 0.22   |      |
|                                          |                                                                                             |                                   | Flox vs. WT                            |            |                    | 0.87   |      |
|                                          |                                                                                             |                                   | Flox vs. Cre                           |            |                    | 0.28   |      |
|                                          |                                                                                             |                                   | WT vs. Cre                             |            |                    | 0.36   |      |
|                                          |                                                                                             | Two-way ANOVA: 175<br>breaths/min | Factor 1: <i>Mecp2</i> -Flox<br>allele | F = 0.10   | 1, 32              | 0.10   |      |
|                                          |                                                                                             |                                   | Factor 2: PET1-Cre<br>allele           | F = 0.82   | 1, 32              | 0.82   |      |
|                                          |                                                                                             |                                   | Interaction (F1 $\times$ F2)           | F = 0.36   | 1, 32              | 0.36   |      |
|                                          |                                                                                             | One-way ANOVA<br>Fisher's LSD     | Genotype                               | F = 1.28   | 3, 32              | 0.30   |      |
|                                          |                                                                                             |                                   | PET1-CKO vs. WT                        |            |                    | 0.30   |      |
|                                          |                                                                                             |                                   | PET1-CKO vs. Cre                       |            |                    | 0.58   |      |
|                                          |                                                                                             |                                   | PET1-CKO vs. Flox                      |            |                    | 0.42   |      |
|                                          |                                                                                             |                                   | Flox vs. WT                            |            |                    | 0.07   |      |
|                                          |                                                                                             |                                   | Flox vs. Cre                           |            |                    | 0.18   |      |
|                                          |                                                                                             |                                   | WT vs. Cre                             |            |                    | 0.63   |      |
|                                          |                                                                                             | Two-way ANOVA: 200<br>breaths/min | Factor 1: <i>Mecp2</i> -Flox<br>allele | F = 0.004  | 1, 32              | <0.001 |      |
|                                          |                                                                                             |                                   | Factor 2: PET1-Cre<br>allele           | F = 0.76   | 1, 32              | 0.76   |      |
|                                          |                                                                                             |                                   | Interaction (F1 $\times$ F2)           | F = 0.18   | 1, 32              | 0.18   |      |
|                                          |                                                                                             | One-way ANOVA<br>Fisher's LSD     | Genotype                               | F = 3.95   | 3, 32              | 0.02   |      |
|                                          |                                                                                             |                                   | PET1-CKO vs. WT                        |            |                    | 0.05   |      |
|                                          |                                                                                             |                                   | PET1-CKO vs. Cre                       |            |                    | 0.22   |      |
|                                          |                                                                                             |                                   | PET1-CKO vs. Flox                      |            |                    | 0.24   |      |
| Flox vs. WT                              |                                                                                             |                                   |                                        | <0.001     |                    |        |      |
| Flox vs. Cre                             |                                                                                             |                                   |                                        | 0.02       |                    |        |      |
| WT vs. Cre                               |                                                                                             |                                   |                                        | 0.45       |                    |        |      |
| Two-way ANOVA: 225<br>breaths/min        | Factor 1: <i>Mecp2</i> -Flox<br>allele                                                      | F = 0.02                          | 1, 32                                  | 0.02       |                    |        |      |
|                                          | Factor 2: PET1-Cre<br>allele                                                                | F = 0.84                          | 1, 32                                  | 0.84       |                    |        |      |
|                                          | Interaction (F1 $\times$ F2)                                                                | F = 0.30                          | 1, 32                                  | 0.30       |                    |        |      |
| One-way ANOVA<br>Fisher's LSD            | Genotype                                                                                    | F = 2.51                          | 3, 32                                  | 0.08       |                    |        |      |
|                                          | PET1-CKO vs. WT                                                                             |                                   |                                        | 0.11       | S4                 |        |      |
|                                          | PET1-CKO vs. Cre                                                                            |                                   |                                        | 0.31       |                    |        |      |
|                                          | PET1-CKO vs. Flox                                                                           |                                   |                                        | 0.38       |                    |        |      |
|                                          | Flox vs. WT                                                                                 |                                   |                                        | 0.02       |                    |        |      |
|                                          | Flox vs. Cre                                                                                |                                   |                                        | 0.06       |                    |        |      |
|                                          | WT vs. Cre                                                                                  |                                   |                                        | 0.55       |                    |        |      |
| Two-way ANOVA: 250<br>breaths/min        | Factor 1: <i>Mecp2</i> -Flox<br>allele                                                      | F = 0.005                         | 1, 32                                  | <0.001     |                    |        |      |
|                                          | Factor 2: PET1-Cre<br>allele                                                                | F = 0.88                          | 1, 32                                  | 0.88       |                    |        |      |
|                                          | Interaction (F1 $\times$ F2)                                                                | F = 0.18                          | 1, 32                                  | 0.18       |                    |        |      |
| One-way ANOVA<br>Fisher's LSD            | Genotype                                                                                    | F = 3.73                          | 3, 32                                  | 0.02       |                    |        |      |
|                                          | PET1-CKO vs. WT                                                                             |                                   |                                        | 0.05       |                    |        |      |
|                                          | PET1-CKO vs. Cre                                                                            |                                   |                                        | 0.25       |                    |        |      |
|                                          | PET1-CKO vs. Flox                                                                           |                                   |                                        | 0.29       |                    |        |      |
|                                          | Flox vs. WT                                                                                 |                                   |                                        | <0.001     |                    |        |      |
|                                          | Flox vs. Cre                                                                                |                                   |                                        | 0.03       |                    |        |      |
|                                          | WT vs. Cre                                                                                  |                                   |                                        | 0.40       |                    |        |      |

| Behavioral paradigm                      | Measurement                                                                          | Statistical test                  | Comparison                             | Statistics | Degrees of freedom | $p$  | Fig. |
|------------------------------------------|--------------------------------------------------------------------------------------|-----------------------------------|----------------------------------------|------------|--------------------|------|------|
| PET1-CKO:<br>Plethysmography<br>(cont'd) | Breathing distribution<br>(% time breathing $\times$<br>25 breaths/min<br>intervals) | Two-way ANOVA: 275<br>breaths/min | Factor 1: <i>Mecp2</i> -Flox<br>allele | F = 0.05   | 1, 32              | 0.05 | S4   |
|                                          |                                                                                      |                                   | Factor 2: PET1-Cre<br>allele           | F = 0.96   | 1, 32              | 0.96 |      |
|                                          |                                                                                      |                                   | Interaction (F1 $\times$ F2)           | F = 0.12   | 1, 32              | 0.12 |      |
|                                          |                                                                                      | One-way ANOVA<br>Fisher's LSD     | Genotype                               | F = 2.22   | 3, 32              | 0.11 |      |
|                                          |                                                                                      |                                   | PET1-CKO vs. WT                        |            |                    | 0.15 |      |
|                                          |                                                                                      |                                   | PET1-CKO vs. Cre                       |            |                    | 0.76 |      |
|                                          |                                                                                      |                                   | PET1-CKO vs. Flox                      |            |                    | 0.28 |      |
|                                          |                                                                                      |                                   | Flox vs. WT                            |            |                    | 0.02 |      |
|                                          |                                                                                      |                                   | Flox vs. Cre                           |            |                    | 0.17 |      |
|                                          |                                                                                      |                                   | WT vs. Cre                             |            |                    | 0.25 |      |
|                                          |                                                                                      | Two-way ANOVA: 300<br>breaths/min | Factor 1: <i>Mecp2</i> -Flox<br>allele | F = 0.58   | 1, 32              | 0.58 |      |
|                                          |                                                                                      |                                   | Factor 2: PET1-Cre<br>allele           | F = 0.78   | 1, 32              | 0.78 |      |
|                                          |                                                                                      |                                   | Interaction (F1 $\times$ F2)           | F = 0.34   | 1, 32              | 0.34 |      |
|                                          |                                                                                      | One-way ANOVA<br>Fisher's LSD     | Genotype                               | F = 0.44   | 3, 32              | 0.72 |      |
|                                          |                                                                                      |                                   | PET1-CKO vs. WT                        |            |                    | 0.85 |      |
|                                          |                                                                                      |                                   | PET1-CKO vs. Cre                       |            |                    | 0.77 |      |
|                                          |                                                                                      |                                   | PET1-CKO vs. Flox                      |            |                    | 0.38 |      |
|                                          |                                                                                      |                                   | Flox vs. WT                            |            |                    | 0.29 |      |
|                                          |                                                                                      |                                   | Flox vs. Cre                           |            |                    | 0.56 |      |
|                                          |                                                                                      |                                   | WT vs. Cre                             |            |                    | 0.63 |      |
|                                          |                                                                                      | Two-way ANOVA: 325<br>breaths/min | Factor 1: <i>Mecp2</i> -Flox<br>allele | F = 0.67   | 1, 32              | 0.67 |      |
|                                          |                                                                                      |                                   | Factor 2: PET1-Cre<br>allele           | F = 0.66   | 1, 32              | 0.66 |      |
|                                          |                                                                                      |                                   | Interaction (F1 $\times$ F2)           | F = 0.22   | 1, 32              | 0.22 |      |
|                                          |                                                                                      | One-way ANOVA<br>Fisher's LSD     | Genotype                               | F = 0.65   | 3, 32              | 0.59 |      |
| PET1-CKO vs. WT                          |                                                                                      |                                   |                                        | 0.99       |                    |      |      |
| PET1-CKO vs. Cre                         |                                                                                      |                                   |                                        | 0.56       |                    |      |      |
| PET1-CKO vs. Flox                        |                                                                                      |                                   |                                        | 0.24       |                    |      |      |
| Flox vs. WT                              |                                                                                      |                                   |                                        | 0.24       |                    |      |      |
| Flox vs. Cre                             |                                                                                      |                                   |                                        | 0.54       |                    |      |      |
| WT vs. Cre                               |                                                                                      |                                   |                                        | 0.57       |                    |      |      |
| Two-way ANOVA: 350<br>breaths/min        | Factor 1: <i>Mecp2</i> -Flox<br>allele                                               | F = 0.06                          | 1, 32                                  | 0.06       |                    |      |      |
|                                          | Factor 2: PET1-Cre<br>allele                                                         | F = 0.83                          | 1, 32                                  | 0.83       |                    |      |      |
|                                          | Interaction (F1 $\times$ F2)                                                         | F = 0.21                          | 1, 32                                  | 0.21       |                    |      |      |
| One-way ANOVA<br>Fisher's LSD            | Genotype                                                                             | F = 1.88                          | 3, 32                                  | 0.15       |                    |      |      |
|                                          | PET1-CKO vs. WT                                                                      |                                   |                                        | 0.22       |                    |      |      |
|                                          | PET1-CKO vs. Cre                                                                     |                                   |                                        | 0.62       |                    |      |      |
|                                          | PET1-CKO vs. Flox                                                                    |                                   |                                        | 0.30       |                    |      |      |
|                                          | Flox vs. WT                                                                          |                                   |                                        | 0.03       |                    |      |      |
|                                          | Flox vs. Cre                                                                         |                                   |                                        | 0.13       |                    |      |      |
|                                          | WT vs. Cre                                                                           |                                   |                                        | 0.46       |                    |      |      |
| Two-way ANOVA: 375<br>breaths/min        | Factor 1: <i>Mecp2</i> -Flox<br>allele                                               | F = 0.03                          | 1, 32                                  | 0.03       |                    |      |      |
|                                          | Factor 2: PET1-Cre<br>allele                                                         | F = 0.98                          | 1, 32                                  | 0.98       |                    |      |      |
|                                          | Interaction (F1 $\times$ F2)                                                         | F = 0.20                          | 1, 32                                  | 0.20       |                    |      |      |
|                                          | One-way ANOVA<br>Fisher's LSD                                                        | Genotype                          | F = 2.36                               | 3, 32      | 0.09               |      |      |
|                                          |                                                                                      | PET1-CKO vs. WT                   |                                        |            | 0.11               |      |      |
|                                          |                                                                                      | PET1-CKO vs. Cre                  |                                        |            | 0.48               |      |      |
|                                          |                                                                                      | PET1-CKO vs. Flox                 |                                        |            | 0.36               |      |      |
|                                          |                                                                                      | Flox vs. WT                       |                                        |            | 0.02               |      |      |
|                                          |                                                                                      | Flox vs. Cre                      |                                        |            | 0.11               |      |      |
|                                          | WT vs. Cre                                                                           |                                   |                                        | 0.37       |                    |      |      |
| Two-way ANOVA: 400<br>breaths/min        | Factor 1: <i>Mecp2</i> -Flox<br>allele                                               | F = 0.45                          | 1, 32                                  | 0.45       |                    |      |      |
